# Supplementary material for: Measurement report: Source apportionment of carbonaceous aerosol using dual-carbon isotopes ( 13 C and 14 C) and levoglucosan in three northern Chinese cities during 2018–2019
Source: Copernicus journal article supplement (doi:10.5194/acp-2021-916), 2021-12-17
Supplement: Supplementary file 1 [file acp-2021-916-supplement.pdf]

*Supplement of*

**Source apportionment of carbonaceous aerosol using dual-carbon isotopes ( $^{13}\text{C}$  and  $^{14}\text{C}$ ) and levoglucosan in three northern Chinese cities during 2018–2019**

**Zhao et al.**

*Correspondence to:* Zhenchuan Niu (niuzc@ieeas.cn) and Weijian Zhou  
(weijian@loess.llqg.ac.cn)

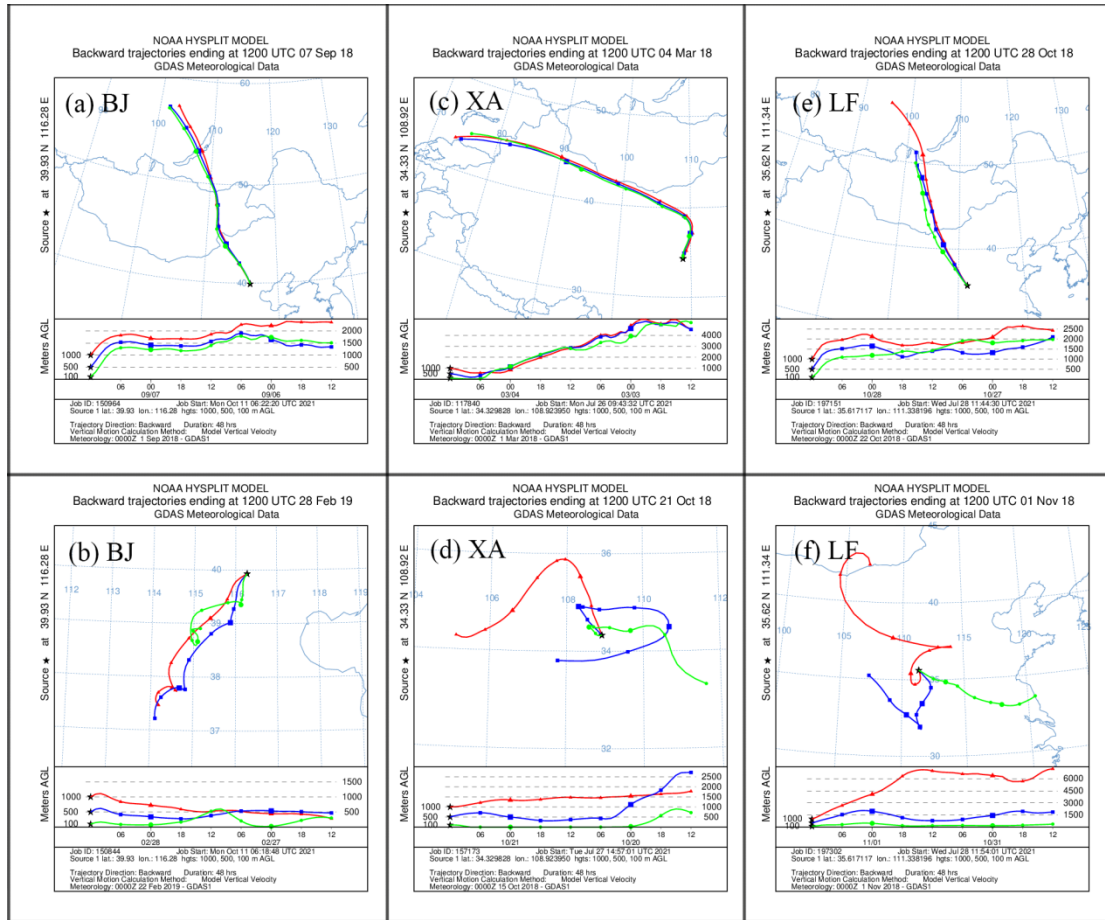

Fig. S1 48-h HYSPLIT air mass backward trajectories at 12:00 UTC on several days in Beijing (BJ), Xi'an (XA) and Linfen (LF), China (<http://www.ready.noaa.gov/index.php>). China adopts BJS (UTC+8).

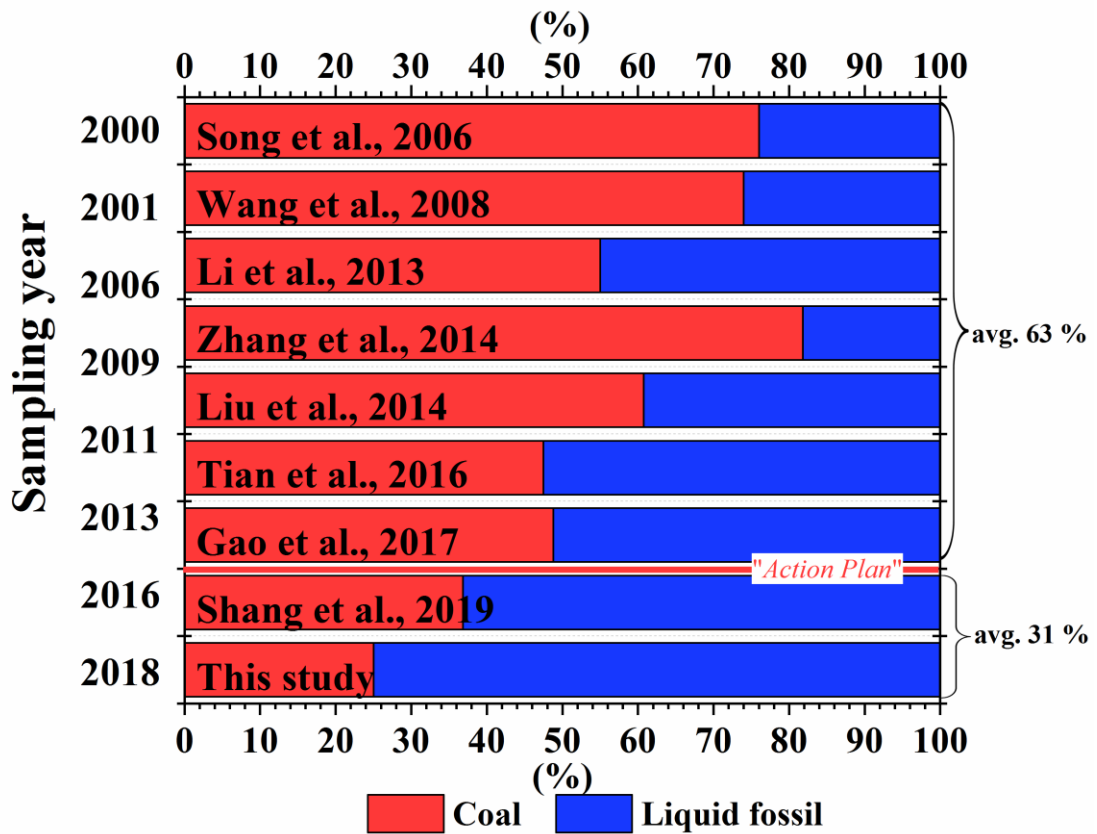

Fig. S2 Comparison of the proportions of coal combustion and liquid fossil combustion in aerosol in some studies in Beijing. The data has been converted. (Gao et al., 2018; Li et al., 2013; Liu et al., 2014; Shang et al., 2019; Song et al., 2006; Tian et al., 2016; Wang et al., 2008; Zhang et al., 2014).

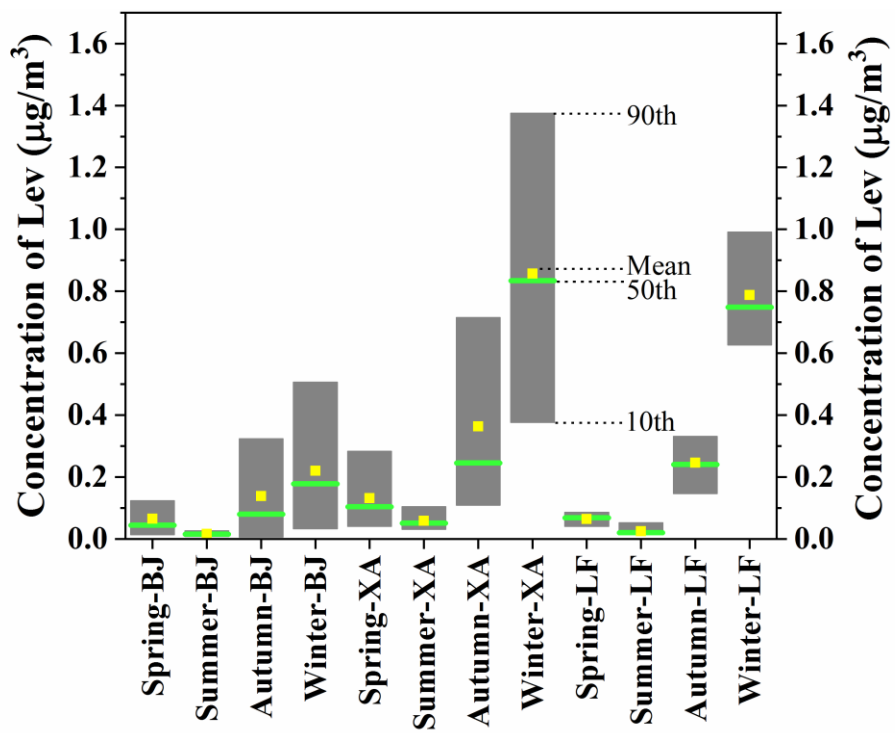

Fig. S3 Distribution of Lev concentration in carbonaceous aerosols at the sampling sites in Beijing (BJ), Xi'an (XA) and Linfen (LF).

## *References*

- Gao, J., Wang, K., Wang, Y., Liu, S., Zhu, C., Hao, J., Liu, H., Hua, S., and Tian, H.: Temporal-spatial characteristics and source apportionment of PM<sub>2.5</sub> as well as its associated chemical species in the Beijing-Tianjin-Hebei region of China, *Environmental pollution*, 233, 714-724, <https://doi.org/10.1016/j.envpol.2017.10.123>, 2018.
- Li, X., Wang, Y., Guo, X., and Wang, Y.: Seasonal variation and source apportionment of organic and inorganic compounds in PM<sub>2.5</sub> and PM<sub>10</sub> particulates in Beijing, China, *Journal of Environmental Sciences*, 25, 741-750, [https://doi.org/10.1016/S1001-0742\(12\)60121-1](https://doi.org/10.1016/S1001-0742(12)60121-1), 2013.
- Liu, Z., Hu, B., Liu, Q., Sun, Y., and Wang, Y.: Source apportionment of urban fine particle number concentration during summertime in Beijing, *Atmospheric Environment*, 96, 359-369, <https://doi.org/10.1016/j.atmosenv.2014.06.055>, 2014.
- Shang, J., Khuzestani, R., Tian, J., Schauer, J., Hua, J., Zhang, Y., Cai, T., Fang, D., An, J., and Zhang, Y.: Chemical characterization and source apportionment of PM<sub>2.5</sub> personal exposure of two cohorts living in urban and suburban Beijing, *Environmental Pollution*, <https://doi.org/10.1016/j.envpol.2018.11.076>, 2019.
- Song, Y., Zhang, Y., Xie, S., Zeng, L., Zheng, M., Salmon, L., Shao, M., and Slanina, S.: Source apportionment of PM<sub>2.5</sub> in Beijing by positive matrix factorization, *Atmospheric Environment*, 40, 1526-1537, <https://doi.org/10.1016/j.atmosenv.2005.10.039>, 2006.

Tian, S., Pan, Y., and Wang, Y.: Size-resolved source apportionment of particulate matter in urban Beijing during haze and non-haze episodes, *Atmospheric Chemistry & Physics*, 16, 9405-9443, <https://doi.org/10.5194/acp-16-1-2016>, 2016.

Wang, H., Zhuang, Y., Wang, Y., Yuan, Y., and Zhuang, G.: Long-term monitoring and source apportionment of PM<sub>2.5</sub>/PM<sub>10</sub> in Beijing, China, *Journal of Environmental Sciences*, 20, 1323-1327, [https://doi.org/10.1016/S1001-0742\(08\)62228-7](https://doi.org/10.1016/S1001-0742(08)62228-7), 2008.

Zhang, R., Jing, J., Tao, J., Hsu, S., Wang, G., Cao, J., Lee, C., Zhu, L., Chen, Z., and Zhao, Y.: Chemical characterization and source apportionment of PM<sub>2.5</sub> in Beijing: seasonal perspective, *Atmospheric Chemistry & Physics*, 13, 7053-7074, <https://doi.org/10.5194/acp-14-175-2014>, 2014.
